# Supplementary material for: Enhanced electrocatalytic activity of in situ carbon encapsulated molybdenum phosphide derived from a hybrid POM for the HER over a wide pH range
Source: Royal Society of Chemistry journal article supplement (doi:10.1039/d1se01591e), 2021-12-20
Supplement: d1se01591e1.pdf [file d1se01591e1.pdf]

## Enhanced electrocatalytic activity of *in-situ* carbon encapsulated Molybdenum Phosphide derived from hybrid POM for HER over a wide pH range

Balasingh Thangadurai Jebaslinhepzybai,<sup>a</sup> Elavarasan Samaraj,<sup>a</sup> Thangaian Kesavan,<sup>a</sup> Manickam Sasidharan,<sup>a</sup> J. Arockia Selvi<sup>b\*</sup>

<sup>a</sup>Energy Storage, Conversion and Catalysis Laboratory, SRM Research Institute and Department of Chemistry, SRM Institute of Science and Technology, Kattankulathur - 603203, Tamilnadu, India.

<sup>b</sup>Department of Chemistry, SRM Institute of Science and Technology, Kattankulathur - 603203, Tamilnadu, India

Corresponding author: [arockiaj@srmist.edu.in](mailto:arockiaj@srmist.edu.in)

### Synthesis of POM-MoP

100 mg of commercial phosphomolybdic acid and 500 mg of sodium hypophosphite were mixed together and followed by calcined at 700 °C for 2h with a heating rate of 5 °C min<sup>-1</sup> under N<sub>2</sub> atmosphere. The black solid was washed with DI water and ethanol then vacuum dried at 60 °C for overnight

### Synthesis of MoP

100 mg of sodium molybdate dihydrate and 500 mg of sodium hypophosphite were mixed together to form a homogeneous mixture. The obtained mixture was calcined at 700 °C for 2h with ramping range of 5 °C min<sup>-1</sup> under N<sub>2</sub> atmosphere. The final product was washed with DI water and ethanol then vacuum dried at 60 °C for overnight.

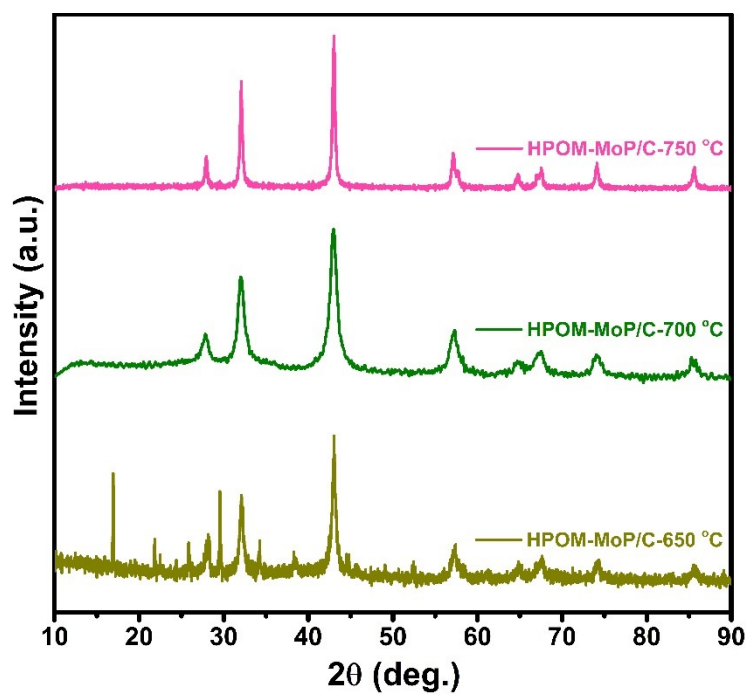

**Fig. S1** Powder XRD profiles of HPOM-MOP/C-650 °C, HPOM-MOP/C-700 °C, and HPOM-MOP/C-750 °C.

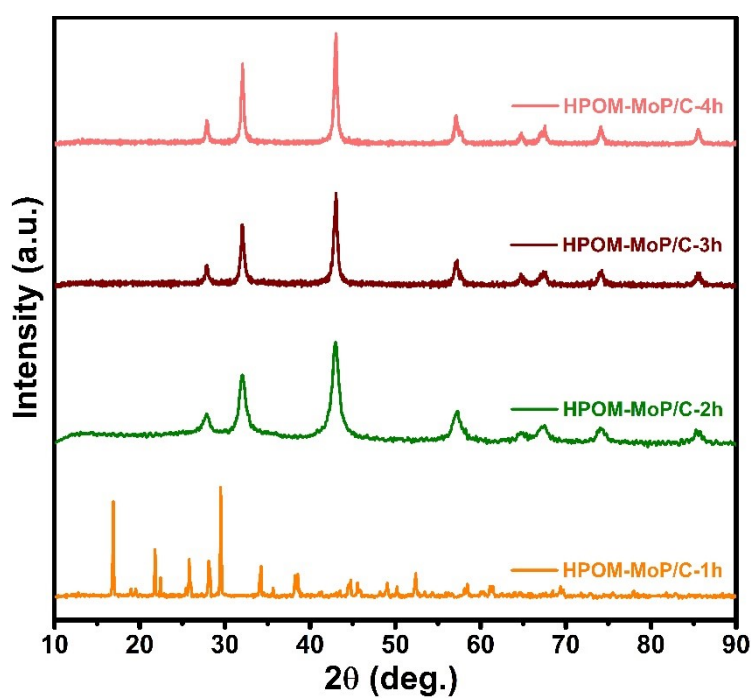

**Fig. S2** Powder XRD profiles of HPOM-MOP/C-1 h, HPOM-MOP/C-2 h, HPOM-MOP/C-3 h and HPOM-MOP/C-4 h.

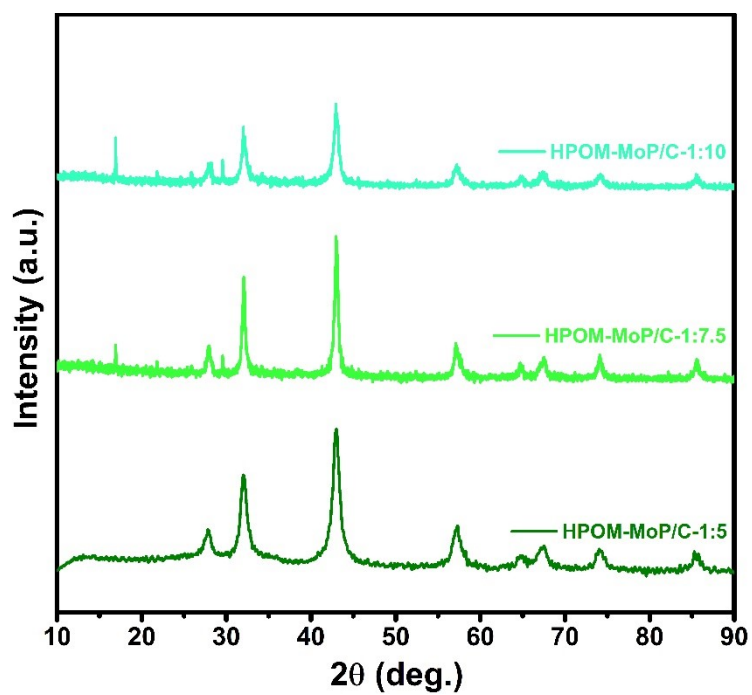

**Fig. S3** Powder XRD profiles of HPOM-MOP/C-1:5, HPOM-MOP/C-1:7.5, and HPOM-MOP/C-1:10.

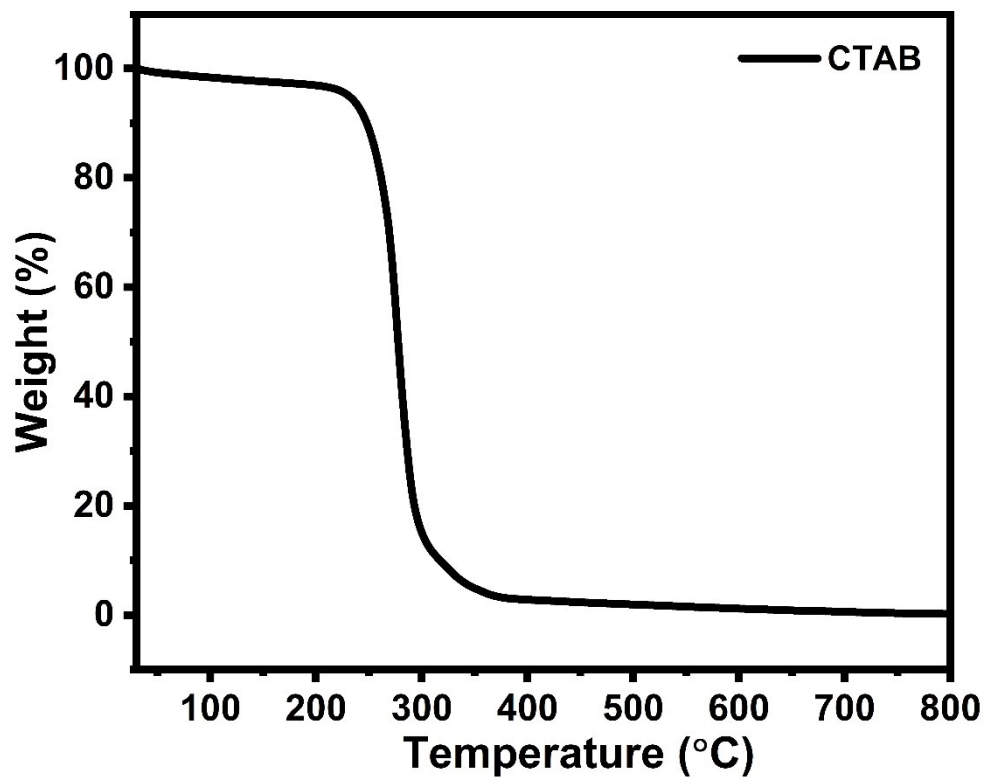

**Fig. S4** TGA curve of cetyltrimethylammonium bromide (CTAB).

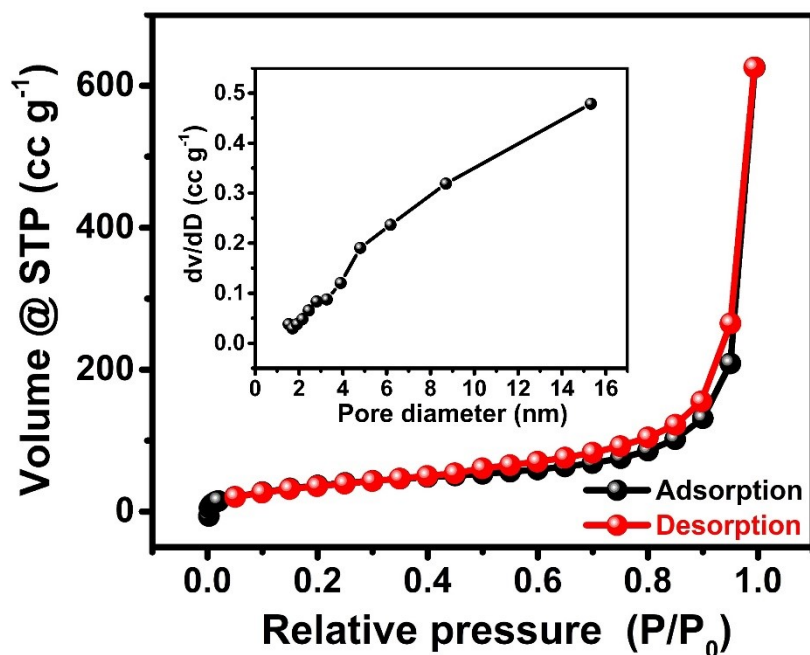

**Fig. S5** BET N<sub>2</sub> adsorption and desorption isotherm curves of HPOM-MoP/C with inset image showing the pore size distribution curves.

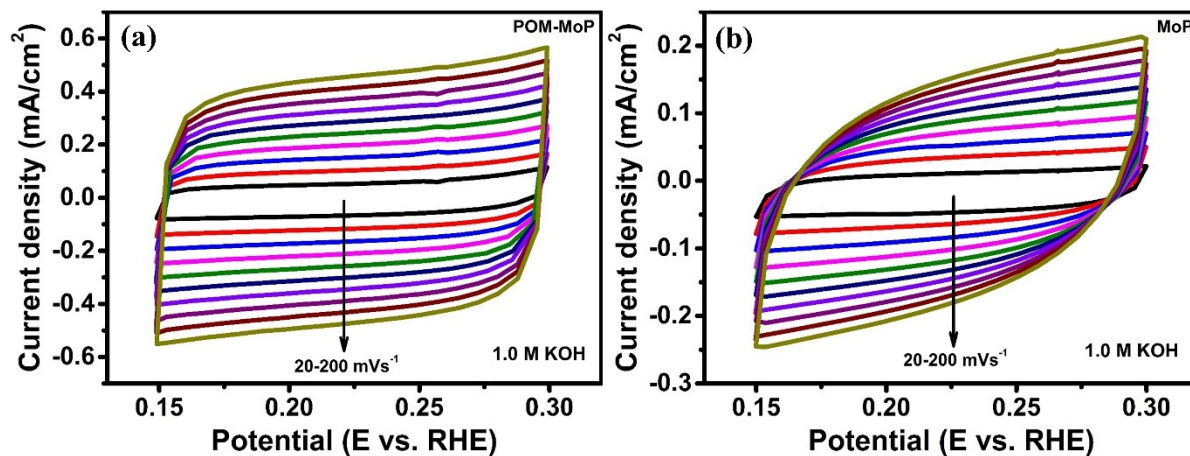

**Fig. S6** Cyclic voltammetry graphs for (a) POM-MoP and (b) MoP in the HER region of 0.15 to 0.30 V vs. RHE in 1.0 M KOH.

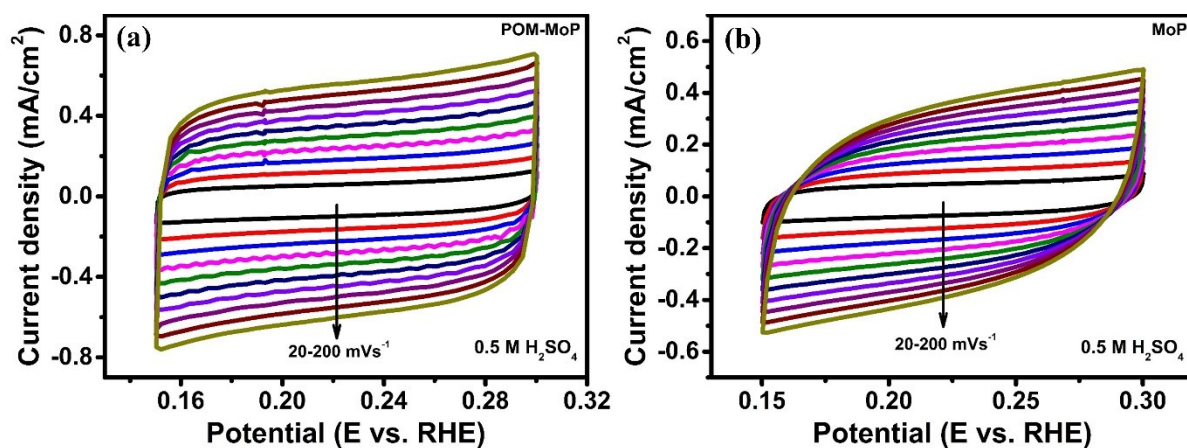

**Fig. S7** Cyclic voltammety graphs for (a) POM-MoP and (b) MoP in the HER region of 0.15 to 0.30 V vs. RHE in 0.5 M H<sub>2</sub>SO<sub>4</sub>.

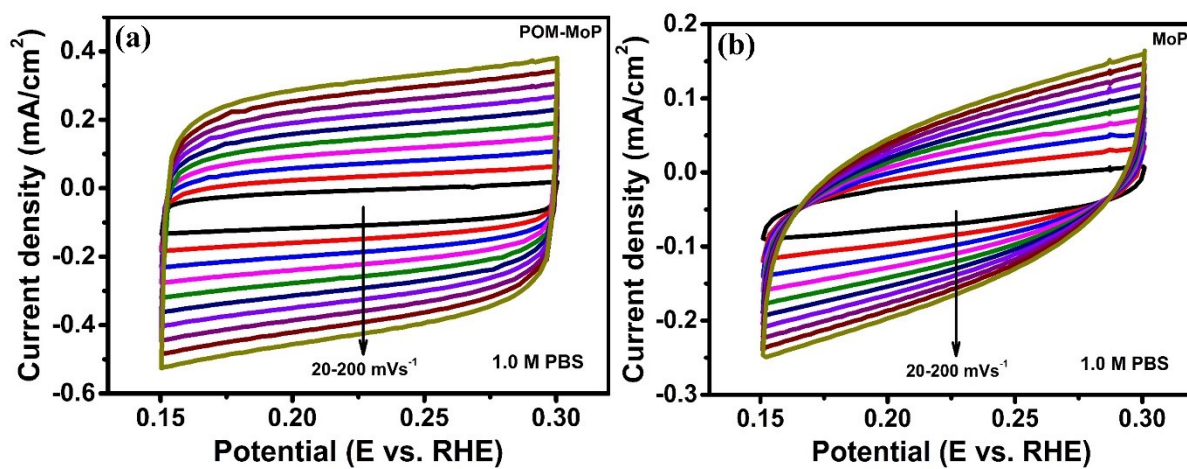

**Fig. S8** Cyclic voltammety graphs for (a) POM-MoP and (b) MoP in the HER region of 0.15 to 0.30 V vs. RHE in 1.0 M PBS.

### Calculation of TOF

The HER Turn over frequency (TOF) of the HPOM-MoP/C electrocatalyst were determined by the following equations.

$$n = \frac{m_{mass}}{M}$$

Where,  $n$  is the number of moles of active sites on the working electrode,  $m_{mass}$  is the mass loading of the active materials and  $M$  is the molar mass of the active materials.

Then we can calculate the TOF using the following equation,

$$TOF = \frac{JA}{2Fn}$$

Where,  $J$  is the current density at the overpotential of 200 mV in A/cm<sup>2</sup>,  $A$  is the area of the working electrode (0.196 cm<sup>2</sup>), 2 represents the stoichiometric number of electrons consumed in the electrode HER reaction and  $F$  is the Faraday constant (96485 C mol<sup>-1</sup>).

**Table S1.** Comparison of HER performance with existing POM based MoP catalysts in acidic,

| Catalyst                                | Particle diameters | Morphology                    | Over potential (mV) @<br>10 mA cm <sup>-2</sup>    |                            |                           | Reference |
|-----------------------------------------|--------------------|-------------------------------|----------------------------------------------------|----------------------------|---------------------------|-----------|
|                                         |                    |                               | Acid<br>(0.5 M<br>H <sub>2</sub> SO <sub>4</sub> ) | Alkaline<br>(1.0 M<br>KOH) | Neutral<br>(1.0 M<br>PBS) |           |
| MoP@NPC/rGO                             | ~ 500 nm           | Rod-like                      | 218                                                | NA                         | NA                        | 1         |
| MoP@PC-CNTs                             | ~ 200 nm           | Nano<br>spherical             | 220                                                | NA                         | NA                        | 2         |
| CQDs/MoP                                | 20 nm              | Irregular<br>Particles        | NA                                                 | 210 @<br>$\eta_{20}$       | NA                        | 3         |
| MoP - 700                               | 8-30 nm            | Nanoparticles                 | NA                                                 | NA                         | 196                       | 4         |
| MoP@PC                                  | ~ 200 nm           | Polyhedral                    | 258                                                | NA                         | NA                        | 5         |
| MoP/rGO                                 | 3 nm               | Cluster-like                  | 119                                                | 140                        | NA                        | 6         |
| MoP/NC                                  | 1.5–3 $\mu$ m      | Microflower                   | 120                                                | 170                        | NA                        | 7         |
| MoP@NC                                  | 50 to 65<br>nm     | Hollow<br>Quasi-<br>Spherical | 52                                                 | 106                        | 171                       | 8         |
| $\alpha$ -MoC <sub>1-x</sub> -<br>MoP/C | 2 nm to 5<br>nm    | Ultrafine<br>Nanoparticles    | 173                                                | NA                         | NA                        | 9         |
| HPOM-MoP/C                              | 15-20 nm           | Spherical                     | 163                                                | 135                        | 166                       | This work |

alkaline and neutral medium

**References**

- 1 J.-S. Li, J.-Q. Sha, B. Du and B. Tang, *Chem. Commun.*, 2017, **53**, 12576–12579.
- 2 J.-S. Li, X.-R. Wang, J.-Y. Li, S. Zhang, J.-Q. Sha, G.-D. Liu and B. Tang, *Carbon N. Y.*, 2018, **139**, 234–240.
- 3 L. Zhang, Y. Yang, M. A. Ziaee, K. Lu and R. Wang, *ACS Appl. Mater. Interfaces*, 2018, **10**, 9460–9467.
- 4 X. Xie, M. Song, L. Wang, M. H. Engelhard, L. Luo, A. Miller, Y. Zhang, L. Du, H. Pan, Z. Nie, Y. Chu, L. Estevez, Z. Wei, H. Liu, C. Wang, D. Li and Y. Shao, *ACS Catal.*, 2019, **9**, 8712–8718.
- 5 J.-S. Li, S. Zhang, J.-Q. Sha, H. Wang, M.-Z. Liu, L.-X. Kong and G.-D. Liu, *ACS Appl.*

- Mater. Interfaces*, 2018, **10**, 17140–17146.
- 6 H. Yan, Y. Jiao, A. Wu, C. Tian, X. Zhang, L. Wang, Z. Ren and H. Fu, *Chem. Commun.*, 2016, **52**, 9530–9533.
  - 7 Y. Huang, X. Song, J. Deng, C. Zha, W. Huang, Y. Wu and Y. Li, *Appl. Catal. B Environ.*, 2019, **245**, 656–661.
  - 8 S. Chakrabartty, D. Sahu and C. R. Raj, *ACS Appl. Energy Mater.*, 2020, **3**, 2811–2820.
  - 9 T. Liu, X. Zhang, T. Guo, Z. Wu and D. Wang, *Electrochim. Acta*, 2020, **334**, 135624.
